# Supplementary material for: Printed flexible mechanical sensors
Source: Royal Society of Chemistry journal article supplement (doi:10.1039/d2nr04015h), 2022-01-01
Supplement: d2nr04015h1.pdf [file d2nr04015h1.pdf]

## Supplementary Information

### Printed flexible mechanical sensors

Samuel Smocot<sup>1#</sup>, Zixin Zhang<sup>1#</sup>, Lingzhi Zhang<sup>1</sup>, Shu Guo<sup>2\*</sup> and Changhong Cao<sup>1\*</sup>

<sup>1</sup>Department of Mechanical Engineering, McGill University, Montreal, Quebec, Canada

<sup>2</sup>School of Vehicle and Energy, Yanshan University, Qinhuangdao, China

<sup>#</sup>These authors contributed equally

\*Corresponding authors: Shu Guo ([shuguo@ysu.edu.cn](mailto:shuguo@ysu.edu.cn)) Changhong Cao ([changhong.cao@mcgill.ca](mailto:changhong.cao@mcgill.ca))

**Table S1 Summary printed flexible mechanical sensors**

| Type of sensor | Printing techniques                          | Printed materials                                                             | Substrate              | Printed parts                                   | Printer                            | Resolution              | Ref. |
|----------------|----------------------------------------------|-------------------------------------------------------------------------------|------------------------|-------------------------------------------------|------------------------------------|-------------------------|------|
| Strain         | Aerosol jet printing                         | PRELECT TPS R <sup>®</sup> , Clariant AgNP ink                                | Kapton <sup>®</sup> PI | Sensing element                                 | Optomec aerosol jet 5X system      | 10µm                    | 1    |
| Strain         | Aerosol jet printing                         | PEDOT:PSS                                                                     | PEI                    | Sensing element                                 | Customized aerosol printing system | 500µm                   | 2    |
| Strain         | Digital light processing, direct ink writing | DLP: GMA, Ebecryl 8804, isodecyl acrylate<br>DIW: GMA, Ebecryl 8804, AgNP ink | Printed elastomer      | DLP: substrate<br>DIW: sensing element, circuit | Customized hybrid printer          | DIW: 100µm<br>DLP: 30µm | 3    |
| Strain         | Digital light processing                     | HEA and IBOA resin                                                            | —                      | Sensing element                                 | SprintRay Pro                      | 95µm                    | 4    |
| Strain         | Digital light processing                     | RGO/elastomer resin                                                           | —                      | Sensing element                                 | B9 Core 550                        | 25µm                    | 5    |
| Strain         | Direct ink writing                           | MWCNTs, Ecoflex 0030, Si NPs                                                  | PDMS                   | Sensing element, electrodes                     | Customized 3D printing system      | —                       | 6    |
| Strain         | Direct ink writing                           | TPU, CNPs                                                                     | PC                     | Sensing element                                 | Anet A8                            | 10µm                    | 7    |
| Strain         | Direct ink writing                           | Indium-tin oxide (ITO)                                                        | PET, polyimide         | Sensing element                                 | Customized printer                 | 100µm                   | 8    |
| Strain         | Fused filament fabrication                   | TPU, ABS/CB                                                                   | —                      | TPU: matrix<br>ABS/CB: microchannels            | Customized dual extruder printer   | —                       | 9    |
| Strain         | Fused filament fabrication                   | NinjaFlex, conductive PLA                                                     | NinjaFlex              | NinjaFlex: matrix<br>PLA: sensing element       | Lulzbut TAZ 5                      | 50µm                    | 10   |
| Strain         | Fused filament fabrication                   | CBPs/TPU composite                                                            | TPU                    | Sensing element, electrodes                     | Multi-material FDM 3D-printer      | 100µm                   | 11   |
| Strain         | Fused filament fabrication                   | GNPs/TPU                                                                      | TPU                    | Sensing element                                 | MakerBot Replicator 2              | 100µm                   | 12   |

|        |                            |                                                                                    |                               |                             |                             |              |    |
|--------|----------------------------|------------------------------------------------------------------------------------|-------------------------------|-----------------------------|-----------------------------|--------------|----|
| Strain | Fused filament fabrication | Conductive TPU                                                                     | TPU                           | Sensing element             | Prusa i3 MK3                | 12.5 $\mu$ m | 13 |
| Strain | Fused filament fabrication | TPU/MWCNT                                                                          | —                             | Sensing element             | Customized FDM printer      | 11 $\mu$ m   | 14 |
| Strain | Fused filament fabrication | MWCNT/GNP/TPU                                                                      | —                             | Sensing element             | ET-K1                       | 11 $\mu$ m   | 15 |
| Strain | Fused filament fabrication | CNT/GNP/TPU                                                                        | —                             | Sensing element             | ET-K1                       | 11 $\mu$ m   | 16 |
| Strain | Inkjet printing            | Ag ink                                                                             | PUA                           | Electrodes                  | Customized printer          | 20 $\mu$ m   | 17 |
| Strain | Inkjet printing            | Conductive silicon rubber (CSR)/silver-coated-glass fiber (AGF)/carbon fibers (CF) | PDMS                          | Sensing element, circuit    | Customized e-3DP printer    | —            | 18 |
| Strain | Inkjet printing            | Ag ink                                                                             | Woven fabrics textile         | Sensing element, circuit    | Fujifilm Dimatix DMP-2850   | 25 $\mu$ m   | 19 |
| Strain | Inkjet printing            | Projet's VisiJet composite                                                         | —                             | Microchannels               | ProJet 5500X inkjet printer | 13 $\mu$ m   | 20 |
| Strain | Inkjet printing            | SunTronic ink                                                                      | Kapton <sup>®</sup> PI        | Sensing element             | Fujifilm Dimatix DMP 2831   | 25 $\mu$ m   | 21 |
| Strain | Inkjet printing            | CNT/PDMS, Ag paste                                                                 | Kapton <sup>®</sup> polyimide | Sensing element, electrodes | Fujifilm Dimatix DMP 2831   | 25 $\mu$ m   | 22 |
| Strain | Screen printing            | MWCNTs/WPU                                                                         | WPU                           | Sensing element             | —                           | —            | 23 |
| Strain | Screen printing            | PVC/CB                                                                             | Polyimide                     | Electrodes                  | —                           | —            | 24 |
| Strain | Screen printing            | CB/AgNP                                                                            | PET                           | Sensing element             | Samborn screen              | —            | 25 |
| Strain | Screen printing            | PDMS/pPVC/CNFs                                                                     | Commercial textile CPNs       | Sensing element             | —                           | —            | 26 |
| Strain | Screen printing            | AgNWs ink                                                                          | PET                           | Sensing element             | Nylon screen                | —            | 27 |
| Strain | Screen printing            | Heptane-graphite ink                                                               | PDMS, Sylgard 184             | Sensing element             | —                           | —            | 28 |

|          |                                              |                                                                     |                             |                                                   |                                   |       |    |
|----------|----------------------------------------------|---------------------------------------------------------------------|-----------------------------|---------------------------------------------------|-----------------------------------|-------|----|
| Pressure | Digital light processing                     | Acrylamide/AA (99%)/MgCl <sub>2</sub> ·6H <sub>2</sub> O, PEGDA/TPO | PET                         | Sensing element                                   | Ruiyi, Han/Laser                  | 50μm  | 29 |
| Pressure | Digital light processing                     | PUA resin                                                           | PET                         | Sensing element                                   | Commercial DLP-based 3D printer   | 400μm | 30 |
| Pressure | Direct ink writing                           | Pr-GO/NaOH                                                          | Glass                       | Microstructure                                    | Fisnar F5200n                     | 1μm   | 31 |
| Pressure | Direct ink writing, inkjet printing          | DIW: elastic silica gel<br>Inkjet: Ag ink                           | PET                         | Inkjet: electrodes<br>DIW: dielectric layer       | Customized single desktop printer | —     | 32 |
| Pressure | Direct ink writing                           | DOWSIL™ SE 1700 Silicone Elastomer/PDMS                             | Silicon wafer               | Dielectric layer                                  | Customized DIW 3D printer         | —     | 33 |
| Pressure | Direct ink writing, Digital light processing | MWCNT/PDMS                                                          | PDMS                        | DLP: substrate<br>DIW: sensing element            | Customized DIW 3D printer         | —     | 34 |
| Pressure | Direct ink writing                           | Graphene coated TPU/CNFs                                            | TPU                         | Sensing element                                   | 350PCS-SM2000M EGAX               | —     | 35 |
| Pressure | Direct ink writing                           | CB/PDMS, PDMS                                                       | —                           | Substrate, sensing element                        | Multi-material 3D printer         | —     | 36 |
| Pressure | Direct ink writing                           | MWCNT/PDMS, Ag ink                                                  | PDMS                        | MWCNT/PDMS: sensing element<br>Ag ink: electrodes | Customized DIW 3D printer         | —     | 37 |
| Pressure | Direct ink writing                           | PDMS/EGO ink                                                        | SU-8 coated silicon wafer   | Sensing element                                   | nScript 3Dn-300                   | 10nm  | 38 |
| Pressure | Inkjet printing                              | Ecoflex 0020 silicone elastomer/CNTs/Si NPs                         | —                           | Entire sensor                                     | Customized 3D printing system     | —     | 39 |
| Pressure | Inkjet printing                              | Ag ink, aluminum-doped zinc oxide ink                               | Glossy photo-paper          | Entire sensor                                     | Commercial inkjet printer         | —     | 40 |
| Pressure | Inkjet printing                              | GO ink                                                              | Polyimide                   | Sensing element                                   | Customized printer                | —     | 41 |
| Pressure | Inkjet printing                              | AgNPs ink                                                           | Kapton® HN or Kapton® Black | Electrodes                                        | Dimatix DMP-2800                  | 25μm  | 42 |
| Pressure | Inkjet printing                              | PEDOT:PSS/PUD, AgNPs                                                | PDMS                        | Electrodes                                        | —                                 | —     | 43 |
| Pressure | Inkjet printing                              | MWCNT ink                                                           | Aramid nanofibers           | Sensing element                                   | HP Deskjet 1112                   | 20μm  | 44 |

|          |                                  |                                                               |                                             |                                                                   |                                       |      |    |
|----------|----------------------------------|---------------------------------------------------------------|---------------------------------------------|-------------------------------------------------------------------|---------------------------------------|------|----|
| Pressure | Inkjet printing                  | Ag ink                                                        | Polyethylene naphtholate                    | Electrodes                                                        | Dimatix inkjet DMP—2800               | 25µm | 45 |
| Pressure | Screen printing                  | AgNWs, TEMs/PDMS composite ink                                | hydrophilic PET                             | AgNWs: electrodes<br>TEMs/PDMS: dielectrics layer                 | —                                     | —    | 46 |
| Pressure | Screen printing                  | Laser-induced graphene (LIG) ink                              | PDMS                                        | Electrodes                                                        | —                                     | —    | 47 |
| Pressure | Screen printing                  | Nano-Ag ink                                                   | PET                                         | Electrodes                                                        | OS-500FB                              | —    | 48 |
| Pressure | Screen printing                  | Ag ink, PDMS                                                  | PET                                         | Ag ink: electrodes<br>PDMS: dielectric layer                      | HMI 485 Semi-Automatic Screen printer | —    | 49 |
| Pressure | Screen printing                  | Conductive CNT ink                                            | PDMS                                        | Electrodes                                                        | AMI MSP 485                           | —    | 50 |
| Pressure | Screen printing                  | Conductive CNT ink                                            | AgNW/TPU                                    | Electrodes                                                        | —                                     | —    | 51 |
| Pressure | Screen printing                  | PANI/COOH-MWCNTs/Ni NPs paste                                 | Cotton fabric                               | Sensing element                                                   | Nylon wire                            | —    | 52 |
| Pressure | Screen printing, inkjet printing | Screen printing: PEDOT:PSS & P(VDF-TrFE)<br>Inkjet: AgNPs ink | Polyethylene naphtholate                    | P(VDF-TrFE): sensing element<br>PEDOT:PSS & AgNPs ink: electrodes | MT320T, Fujifilm Dimatix DMP2831      | 25µm | 53 |
| Pressure | Screen printing                  | Ag, laser-induced graphene (LIG), PDMS                        | PET, polyimide                              | Electrodes, sensing element                                       | —                                     | —    | 54 |
| Pressure | Screen printing                  | Ag ink, PEDOT:PSS                                             | Ag ink: PDMS/PET<br>PEDOT:PSS: tissue paper | Ag ink: electrodes<br>PEDOT:PSS: sensing element                  | —                                     | —    | 55 |
| Pressure | Electrohydrodynamics printing    | AgNP-based ink                                                | Teslin                                      | Sensing element                                                   | Homemade EHD printing system          | —    | 56 |
| Force    | Aerosol jet printing             | AgNP ink, PI ink                                              | Kapton <sup>®</sup> polyimide               | Electrodes                                                        | Aerosol Jet 200                       | 25µm | 57 |
| Force    | Digital light processing         | SP-RF0900/Ebecryl 110                                         | —                                           | Substrate                                                         | DLP-based printing system             | —    | 58 |
| Force    | Digital light processing         | PEDOT:PSS/PUA                                                 | —                                           | Sensing element, electrodes                                       | M-Jewelry U50                         | 50µm | 59 |

|       |                                               |                                         |                   |                                                                       |                                                   |                                      |    |
|-------|-----------------------------------------------|-----------------------------------------|-------------------|-----------------------------------------------------------------------|---------------------------------------------------|--------------------------------------|----|
| Force | Direct ink writing                            | PDMS MPs/PDMS-CNTs                      | —                 | Sensing element                                                       | —                                                 | —                                    | 60 |
| Force | Direct ink writing                            | PDMS/Graphene, PDMS                     | —                 | Sensing element                                                       | Commercial 3D printer                             | —                                    | 61 |
| Force | Direct ink writing                            | PDMS/ barium titanate, MWCNTs           | —                 | MWCNTs: electrodes<br>PDMS/BTO: sensing element                       | Hyrel 30 M printer                                | 5 $\mu$ m                            | 62 |
| Force | Direct ink writing                            | SE 1700, Ecoflex 0030, silica NP, NdFeB | —                 | Sensing element                                                       | Customized printer                                | 100 $\mu$ m                          | 63 |
| Force | Direct ink writing, inkjet printing           | Inkjet: Ag ink<br>DIW: silicone ink     | PET               | Ag ink: electrode<br>Silicone ink: dielectric layer                   | Customized Prtronic microelectronic printer       | 20 $\mu$ m                           | 64 |
| Force | Fused filament fabrication                    | PI/ETPU/ NinjaFlex                      | —                 | NinjaFlex: Dielectric layer<br>PI/ETPU: electrodes                    | FlashForge Creator Pro                            | 200 $\mu$ m                          | 65 |
| Force | Fused filament fabrication                    | PI/ETPU 95–250 CB                       | Ninjabflex        | Sensing element                                                       | FlashForge Inventor                               | 11 $\mu$ m                           | 66 |
| Force | Fused filament fabrication, stereolithography | FDM: polylactic acid—PLA, SLA: HTM 140  | —                 | Sensing element                                                       | FDM: RepRap Prusa I3<br>SLA: Perfactory Micro EDU | FDM: 400 $\mu$ m<br>SLA: 150 $\mu$ m | 67 |
| Force | Fused filament fabrication                    | CNT/ TPU, ABS                           | —                 | Sensing element                                                       | Makerbot 2X replicator                            | 11 $\mu$ m                           | 68 |
| Force | Fused filament fabrication                    | TPU, carbon based PLA                   | TPU               | TPU: dielectric layer<br>Carbon based PLA: electrode, sensing element | Ultimaker s5                                      | 6.9 $\mu$ m                          | 69 |
| Force | Fused filament fabrication                    | Carbon doped TPU, PLA                   | —                 | Sensing element                                                       | Diabase H-Series Hybrid                           | 5 $\mu$ m                            | 70 |
| Force | Fused filament fabrication                    | CNT/GNP/TPU CPCs                        | TPU               | Sensing element                                                       | Commercial FFF printer                            | —                                    | 71 |
| Force | Inkjet printing, transfer printing            | MWCNT                                   | PET, PDMS         | Sensing element                                                       | HP Envy 4501                                      | 20 $\mu$ m                           | 72 |
| Force | Inkjet printing                               | P(VDF-TrFE-CTFE) terpolymer             | Polyimide         | Sensing element                                                       | PiXDRO LP50                                       | 15 $\mu$ m                           | 73 |
| Force | Inkjet printing                               | PEDOT/PSS                               | Transparent high- | Sensing element                                                       | Dimatix DMP-3000                                  | 5 $\mu$ m                            | 74 |

|       |                    |                                             |                                      |                                                                           |                       |            |    |
|-------|--------------------|---------------------------------------------|--------------------------------------|---------------------------------------------------------------------------|-----------------------|------------|----|
|       |                    |                                             | temperature resin                    |                                                                           |                       |            |    |
| Force | Inkjet printing    | DGP 40LT-15C Ag ink                         | PET                                  | Electrodes                                                                | Dimatix DMP-2850      | 25 $\mu$ m | 75 |
| Force | Screen printing    | Copper/conductive adhesive                  | PET                                  | Electrodes                                                                | —                     | —          | 76 |
| Force | Screen printing    | Ag paste, P(VDF-TrFE)/MWCNT/PDMS composites | Polyimide                            | Ag paste: electrode<br>P(VDF-TrFE)/MWCNT/PDMS composites: sensing element | —                     | —          | 77 |
| Force | Screen printing    | Conductive copper adhesive                  | Flexible printed circuit board, PET  | Electrodes                                                                | —                     | —          | 78 |
| Force | Screen printing    | Ag ink, AgNP/CNT                            | PET                                  | Electrodes                                                                | —                     | —          | 79 |
| Force | Screen printing    | Ag ink                                      | PET                                  | Electrodes                                                                | —                     | —          | 80 |
| Force | Screen printing    | PVDF, Ag ink                                | PET, paper                           | Electrodes, circuit                                                       | —                     | —          | 81 |
| Force | Screen printing    | Ag 800, PDMS                                | Kapton <sup>®</sup> 500HN, polyimide | Ag 800: electrodes<br>PDMS: dielectric layer                              | AMI MSP 485           | —          | 82 |
| Force | Dispenser printing | MWCNTs                                      | —                                    | Electrodes                                                                | Customized printer    | 100nm      | 83 |
| Force | Dispenser printing | Ag/silicone elastomer                       | Glass                                | Sensing element                                                           | Customized 3D printer | —          | 84 |

**Table S2. Comparison of printed flexible force sensors**

| Printing technology | Active material                                         | Range                                                   | Sensitivity                                                         | Sensing principle | Ref. |
|---------------------|---------------------------------------------------------|---------------------------------------------------------|---------------------------------------------------------------------|-------------------|------|
| FFF                 | Carbon doped conductive TPU                             | 1-10N                                                   | Not consistent                                                      | Piezoresistive    | 49   |
| DLP                 | PEDOT: PSS                                              | 0-4N                                                    | 1500 ohm/N*                                                         | Piezoresistive    | 59   |
| Screen printing     | MWCNT/PDMS                                              | 0-10N                                                   | 20 kiloohm/N                                                        | Piezoresistive    | 77   |
| Screen printing     | Polyvinylidene fluoride trifluoroethylene [P(VDF-TrFE)] | 0.5-4N                                                  | 0.05 V/N                                                            | Piezoresistive    | 77   |
| DIW                 | MWCNT/TangoPlus                                         | 0-20N                                                   | 0.175V/N*                                                           | Piezoresistive    | 83   |
| Screen printing     | Conductive rubber                                       | 0-0.6N in x-axis<br>0-0.6N in y-axis<br>0-15N in z-axis | 0.471 V/N in x-axis<br>0.466 V/N in y-axis<br>0.201 V/N at 0-6N and | Piezoresistive    | 76   |

|                        |                                         |                                                    |                                                                                                  |                |    |
|------------------------|-----------------------------------------|----------------------------------------------------|--------------------------------------------------------------------------------------------------|----------------|----|
|                        |                                         |                                                    | 0.067 V/N at 6-15N in z-axis                                                                     |                |    |
| Screen printing        | Silver                                  | 0-1.4N                                             | 1.2 V/N                                                                                          | Piezoelectric  | 81 |
| Screen printing        | Conductive rubber                       | 0-1N in x-axis<br>0-1N in y-axis<br>0-3N in z-axis | 1.59 V/N in x-axis<br>1.49 V/N in y-axis<br>1.87 V/N at 0-6 N and<br>0.47 V/N at 6-15N in z-axis | Piezoresistive | 78 |
| FFF                    | CNT/TPU                                 | 0-4N in x, y, and z-axis                           | 2%-2.8%/N in x-axis<br>0.5%-0.7%/N in y-axis<br>0.6%-0.68%/N in z-axis*                          | Piezoresistive | 68 |
| Inkjet printing        | PEDOT: PSS                              | 0-0.16N                                            | 2.92%/N                                                                                          | Piezoresistive | 74 |
| DLP                    | Galinstan                               | 0-10N                                              | 29%/N                                                                                            | Piezoresistive | 58 |
| Extrusion-based system | CNT/TangoPlus                           | 0-10N                                              | 10%/N*                                                                                           | Piezoresistive | 85 |
| FFF                    | CNT/graphite nanosheet (GNP)-filled TPU | 0-5N out of plane force                            | 10%/N*                                                                                           | Piezoresistive | 71 |
| Inkjet printing        | CNT/PDMS                                | 0-0.5N                                             | 40%/N                                                                                            | Piezoresistive | 72 |
| Screen printing        | Silver                                  | 0-0.04N                                            | 100%/N                                                                                           | Piezoresistive | 86 |
| Inkjet printing        | Silver                                  | 0-8N                                               | 5.2 fF/N in normal and 13.1 fF/N in shear force                                                  | Capacitive     | 75 |
| FFF                    | Conductive TPU                          | 3.5-10N                                            | 0.01 pF/N*                                                                                       | Capacitive     | 65 |
| FFF                    | Graphite/PDMS                           | 0.004-0.0175N                                      | 0.2542 pF/mN                                                                                     | Capacitive     | 87 |
| Aerosol-jet printing   | Silver                                  | 0-9N                                               | 3.75 pF/N                                                                                        | Capacitive     | 57 |
| Screen printing        | Silver                                  | 1-100N                                             | 0.081% /N                                                                                        | Capacitive     | 82 |
| FFF                    | Carbon based PLA                        | 0-45N                                              | 0.088 %/N                                                                                        | Capacitive     | 69 |

## Reference

- 1 S. Agarwala, G. L. Goh and W. Y. Yeong, *IEEE Access*, 2018, **6**, 63080–63086.
- 2 B. Thompson and H.-S. Yoon, *IEEE Sens J*, 2013, **13**, 4256–4263.
- 3 X. Peng, X. Kuang, D. J. Roach, Y. Wang, C. M. Hamel, C. Lu and H. J. Qi, *Addit Manuf*, 2021, **40**, 101911.
- 4 S. Peng, Q. Guo, N. Thirunavukkarasu, Y. Zheng, Z. Wang, L. Zheng, L. Wu and Z. Weng, *Chemical Engineering Journal*, 2022, **439**, 135593.
- 5 C. Qian, T. Xiao, Y. Chen, N. Wang, B. Li and Y. Gao, *Adv Eng Mater*, 2022, **24**, 2101068.
- 6 Z. Tang, S. Jia, X. Shi, B. Li and C. Zhou, *Polymers (Basel)*, 2019, **11**, 666.
- 7 S. Ahmed, S. Nauman and Z. M. Khan, in *2021 International Bhurban Conference on Applied Sciences and Technologies (IBCAST)*, IEEE, Islamabad, Pakistan, 2021, pp. 47–54.
- 8 Z. Ahmadi, S. Lee, A. Patel, R. R. Unocic, N. Shamsaei and M. Mahjouri-Samani, *Adv Mater Interfaces*, 2022, **9**, 2102569.
- 9 S. Kouchakzadeh and K. Narooei, *Sens Actuators A Phys*, 2021, **332**, 113214.
- 10 K. Elgeneidy, G. Neumann, M. Jackson and N. Lohse, *Front Robot AI*, 2018, **5**, 2.

- 
- 11 B. Li, S. Zhang, L. Zhang, Y. Gao and F. Xuan, *J Manuf Process*, 2022, **74**, 283–295.
- 12 Z. Li, B. Li, B. Chen, J. Zhang and Y. Li, *Nanotechnology*, 2021, **32**, 395503.
- 13 M. Gandler, F. Eibensteiner and J. Langer, in *2019 International Conference on Information and Digital Technologies (IDT)*, IEEE, Zilina, Slovakia, 2019.
- 14 C. Hohimer, N. Aliheidari, C. Mo and A. Ameli, in *ASME 2017 Conference on Smart Materials, Adaptive Structures and Intelligent Systems*, American Society of Mechanical Engineers, Snowbird, UT, USA, 2017, p. V001T08A004.
- 15 X. Chen, X. Zhang, D. Xiang, Y. Wu, C. Zhao, H. Li, Z. Li, P. Wang and Y. Li, *Mater Lett*, 2022, **306**, 130935.
- 16 D. Xiang, X. Zhang, Z. Han, Z. Zhang, Z. Zhou, E. Harkin-Jones, J. Zhang, X. Luo, P. Wang, C. Zhao and Y. Li, *J Mater Sci*, 2020, **55**, 15769–15786.
- 17 C. Gai, D. Li, X. Zhang, H. Zhang, N. Li, X. Zheng, D. Wu and J. Sun, *Adv Mater Interfaces*, 2021, **8**, 2100632.
- 18 C. Zhao, Z. Xia, X. Wang, J. Nie, P. Huang and S. Zhao, *Mater Des*, 2020, **193**, 108788.
- 19 B. M. Li, I. Kim, Y. Zhou, A. C. Mills, T. J. Flewellin and J. S. Jur, *Adv Mater Technol*, 2019, **4**, 1900511.
- 20 S. Agarwala, G. L. Goh, Y. L. Yap, G. D. Goh, H. Yu, W. Y. Yeong and T. Tran, *Sens Actuators A Phys*, 2017, **263**, 593–599.
- 21 P. C. Joshi, T. Kuruganti and S. M. Killough, *ECS Journal of Solid State Science and Technology*, 2015, **4**, P3091–P3096.
- 22 J. Jehn, P. Oser, M. A. M. Courrau, M. Kaiser, D. Wu, C. U. Grosse, U. Moosheimer, A. Ruediger and C. Schindler, *IEEE Access*, 2021, **9**, 72207–72216.
- 23 P. Xia, P. Liu, S. Wu, Q. Zhang, P. Wang, R. Hu, K. Xing, C. Liu, A. Song, X. Yang and Y. Huang, *Compos Sci Technol*, 2022, **221**, 109355.
- 24 Y. Xiao, S. Jiang, Y. Li and W. Zhang, *Smart Mater Struct*, 2020, **29**, 045023.
- 25 X. Qi, H. Ha, B. Hwang and S. Lim, *Applied Sciences (Switzerland)*, 2020, **10**, 1–10.
- 26 H. A. K. Toprakci, S. K. Kalanadhabhatla, R. J. Spontak and T. K. Ghosh, *Adv Funct Mater*, 2013, **23**, 5536–5542.
- 27 S. Ke, P. Guo, C. Pang, B. Tian, C. Luo, H. Zhu and W. Wu, *Adv Mater Technol*, 2020, **5**, 1901097.
- 28 M. Hu, P. Kassanos, M. Keshavarz, E. Yeatman and B. Lo, in *2021 IEEE International Conference on Flexible and Printable Sensors and Systems (FLEPS)*, IEEE, Piscataway, NJ, USA, 2021, p. 4 pp.
- 29 H. Yan, J. Zhou, C. Wang, H. Gong, W. Liu, W. Cen, G. Yuan and Y. Long, *Smart Mater Struct*, 2022, **31**, 015019.
- 30 Y. M. Yin, H. Y. Li, J. Xu, C. Zhang, F. Liang, X. Li, Y. Jiang, J. W. Cao, H. F. Feng, J. N. Mao, L. Qin, Y. F. Kang and G. Zhu, *ACS Appl Mater Interfaces*, 2021, **13**, 10388–10396.
- 31 K. Cao, M. Wu, J. Bai, Z. Wen, J. Zhang, T. Wang, M. Peng, T. Liu, Z. Jia, Z. Liang and L. Jiang, *Adv Funct Mater*, 2022, **32**, 2202360.
- 32 Q. Ding, H. Chen, W. M. Zhang and L. Shao, in *2021 IEEE 16th International Conference on Nano/Micro Engineered and Molecular Systems (NEMS)*, IEEE, Xiamen, China, 2021, pp. 1297–1300.
- 33 W. Yang, Y. Liu, W. Xu and H. Y. Nie, *IEEE Sens J*, 2021, **21**, 10473–10482.
- 34 C. Fekiri, H. C. Kim and I. H. Lee, *Materials*, 2020, **13**, 1–12.
- 35 Y. Yin, Y. Wang, H. Li, J. Xu, C. Zhang, X. Li, J. Cao, H. Feng and G. Zhu, *Chemical Engineering Journal*, 2022, **430**, 133158.
- 36 G. Zhu, H. Dai, Y. Yao, W. Tang, J. Shi, J. Yang and L. Zhu, *Adv Mater Technol*, 2021, **7**, 2101239.
- 37 C. Fekiri, C. Kim, H. C. Kim, J. H. Cho and I. H. Lee, *International Journal of Precision Engineering and Manufacturing*, 2022, **23**, 453–458.



- 
- 38 G. Shi, S. E. Lowe, A. J. T. Teo, T. K. Dinh, S. H. Tan, J. Qin, Y. Zhang, Y. L. Zhong and H. Zhao, *Appl Mater Today*, 2019, **16**, 482–492.
- 39 Z. Tang, S. Jia, C. Zhou and B. Li, *ACS Appl Mater Interfaces*, 2020, **12**, 28669–28680.
- 40 S. D. Gardner, M. R. Haider, M. T. Islam, J. I. D. Alexander and Y. Massoud, in *Midwest Symposium on Circuits and Systems*, Institute of Electrical and Electronics Engineers Inc., 2019, vol. 2019-August, pp. 1101–1104.
- 41 Y. Peng, J. Zhou, X. Song, K. Pang, A. Samy, Z. Hao and J. Wang, *Sensors (Switzerland)*, 2021, **21**, 1–12.
- 42 D. Thi Ngoc Nga, G. Mattana, V. T. Thu, R. Roussel and B. Piro, *Sens Actuators A Phys*, 2022, **338**, 113490.
- 43 K. Kim, M. Jung, B. Kim, J. Kim, K. Shin, O. S. Kwon and S. Jeon, *Nano Energy*, 2017, **41**, 301–307.
- 44 J. Wu, H. Pang, L. Ding, Y. Wang, X. He, Q. Shu, S. Xuan and X. Gong, *Chemical Engineering Journal*, 2021, **421**, 129830.
- 45 X. Wu, Y. Khan, J. Ting, J. Zhu, S. Ono, X. Zhang, S. Du, J. W. Evans, C. Lu and A. C. Arias, *Adv Electron Mater*, 2020, **6**, 1901310.
- 46 L. Mo, X. Meng, J. Zhao, Y. Pan, Z. Sun, Z. Guo, W. Wang, Z. Peng, C. Shang, S. Han, K. Hu, M. Cao, Y. Chen, Z. Xin, J. Lu and L. Li, *Flexible and Printed Electronics*, 2021, **6**, 014001.
- 47 J. Zhao, J. Gui, J. Luo, J. Gao, C. Zheng and R. Xu, *Journal of Micromechanics and Microengineering*, 2022, **32**, 015002.
- 48 Z. Guo, L. Mo, Y. Ding, Q. Zhang, X. Meng, Z. Wu, Y. Chen, M. Cao, W. Wang and L. Li, *Micromachines (Basel)*, 2019, **10**, 715.
- 49 V. Palaniappan, S. Masihi, M. Panahi, D. Maddipatla, A. K. Bose, X. Zhang, B. B. Narakathu, B. J. Bazuin and M. Z. Atashbar, *IEEE Sens J*, 2020, **20**, 7605–7613.
- 50 D. Maddipatla, B. B. Narakathu, M. M. Ali, A. A. Chlahawi and M. Z. Atashbar, in *2017 IEEE Sensors Applications Symposium (SAS)*, IEEE, Glassboro, NJ, USA, 2017.
- 51 J. Wang, Y. Lou, B. Wang, Q. Sun, M. Zhou and X. Li, *Sensors (Switzerland)*, 2020, **20**, 2459.
- 52 Z. Ma, W. Wang and D. Yu, *Adv Mater Interfaces*, 2020, **7**, 1901704.
- 53 T. Sekine, A. Galtis, J. Sato, K. Miyazawa, K. Muraki, R. Shiwaku, Y. Takeda, H. Matsui, D. Kumaki, F. Domingues Dos Santos, A. Miyabo, M. Charbonneau and S. Tokito, *ACS Appl Electron Mater*, 2019, **1**, 246–252.
- 54 S. Wakabayashi, T. Arie, S. Akita and K. Takei, *ACS Omega*, 2020, **5**, 17721–17725.
- 55 X. H. Zhao, X. Liang and Q. J. Sun, *Polym Int*, 2021, **70**, 450–456.
- 56 X. Zhu, Z. Qian, X. Chen, L. Liu, C. Sheng and W. Gu, *IEEE Sens J*, 2021, **21**, 5836–5844.
- 57 Q. Jing, A. Pace, L. Ives, A. Husmann, N. Čatić, V. Khanduja, J. Cama and S. Kar-Narayan, *Cell Rep Phys Sci*, 2021, **2**, 100386.
- 58 Y. Wang, J. Jin, Y. Lu and D. Mei, *Int J Smart Nano Mater*, 2021, **12**, 269–285.
- 59 Y. Shao, Y. Zhao, M. Liu, Q. Zhang and C. Liu, in *IEEE Sensors*, IEEE, New Delhi, India, 2018, vol. 2018- October.
- 60 H. Wang, H. Yang, S. Zhang, L. Zhang, J. Li and X. Zeng, *Adv Mater Technol*, 2019, **4**, 1900147.
- 61 H. Wang, Y. Cen and X. Zeng, *ACS Appl Mater Interfaces*, 2021, **13**, 28538–28545.
- 62 A. Renteria, V. H. Balcorta, C. Marquez, A. A. Rodriguez, I. Renteria-Marquez, J. Regis, B. Wilburn, S. Patterson, D. Espalin, T. L. Tseng and Y. Lin, *Flexible and Printed Electronics*, 2022, **7**, 015001.
- 63 X. Zhang, H. Hu, D. Tang, C. Zhang, J. Fu and P. Zhao, *Sens Actuators A Phys*, 2021, **327**, 112753.
- 64 Q. Ding, H. Chen, J. Wu, T. Zheng, W.-M. Zhang and L. Shao, *IEEE Sens J*, 2022, **22**, 11552–11561.
- 65 G. Wolterink, R. Sanders and G. Krijnen, in *IEEE Sensors*, IEEE, New Delhi, India, 2018, vol. 2018- October.

- 
- 66 D. Singh, C. Tawk, R. Mutlu, E. Sariyildiz, V. Sencadas and G. Alici, in *2020 3rd IEEE International Conference on Soft Robotics (RoboSoft)*, IEEE, New Haven, CT, USA, 2020, pp. 458–463.
- 67 J. Qu, Q. Wu, T. Clancy, Q. Fan, X. Wang and X. Liu, *IEEE Sens J*, 2020, **20**, 6971–6978.
- 68 K. Kim, J. Park, J. hoon Suh, M. Kim, Y. Jeong and I. Park, *Sens Actuators A Phys*, 2017, **263**, 493–500.
- 69 X. Aeby, R. van Dommelen and D. Briand, in *2019 20th International Conference on Solid-State Sensors, Actuators and Microsystems & Eurosensors XXXIII (TRANSDUCERS & EUROSENSORS XXXIII)*, IEEE, Berlin, Germany, 2019.
- 70 G. Wolterink, R. Sanders and G. Krijnen, in *IEEE Sensors*, IEEE, Montreal, QC, Canada, 2019, vol. 2019- October.
- 71 D. Xiang, Z. Zhang, Y. Wu, J. Shen, E. Harkin-Jones, Z. Li, P. Wang, C. Zhao, H. Li and Y. Li, *Macromol Mater Eng*, 2021, **306**, 2100437.
- 72 T. H. da Costa and J. W. Choi, *Microelectron Eng*, 2017, **174**, 64–69.
- 73 Q. Liu, M. Q. Le, C. Richard, R. Liang, P. J. Cottinet and J. F. Capsal, *Org Electron*, 2019, **67**, 259–271.
- 74 M. Liu, Q. Zhang, Y. Shao, C. Liu and Y. Zhao, *Micromachines (Basel)*, 2019, **10**, 20.
- 75 A. Albrecht, M. Trautmann, M. Becherer, P. Lugli and A. Rivadeneyra, *J Sens*, 2019, **2019**, 1864239.
- 76 Y. Wang, X. Wu, D. Mei, L. Zhu and J. Chen, *Sens Actuators A Phys*, 2019, **297**, 111512.
- 77 S. Khan, S. Tinku, L. Lorenzelli and R. S. Dahiya, *IEEE Sens J*, 2015, **15**, 3146–3155.
- 78 Y. Wang, W. Ding and D. Mei, *Measurement (Lond)*, 2021, **180**, 109524.
- 79 K. Kanao, S. Harada, Y. Yamamoto, W. Honda, T. Arie, S. Akita and K. Takei, *RSC Adv*, 2015, **5**, 30170–30174.
- 80 S. Honda, Q. Zhu, S. Satoh, T. Arie, S. Akita and K. Takei, *Adv Funct Mater*, 2019, **29**, 1807957.
- 81 S. Emamian, B. B. Narakathu, A. A. Chlaihawi, B. J. Bazuin and M. Z. Atashbar, *Sens Actuators A Phys*, 2017, **263**, 639–647.
- 82 D. Maddipatla, X. Zhang, A. K. Bose, S. Masihi, B. B. Narakathu, B. J. Bazuin, J. D. Williams, M. F. Mitchell and M. Z. Atashbar, *IEEE Access*, 2020, **8**, 207813–207821.
- 83 J. K. Lee, H. H. Kim, J. W. Choi, K. C. Lee and S. Lee, *Int J Control Autom Syst*, 2018, **16**, 929–936.
- 84 S. Z. Guo, K. Qiu, F. Meng, S. H. Park and M. C. McAlpine, *Advanced Materials*, 2017, **29**, 1701218.
- 85 M. O. F. Emon, A. Russell, G. Nadkarni and J. W. Choi, *Journal of Medical Devices, Transactions of the ASME*, 2021, **15**, 034502–034508.
- 86 S. Harada, K. Kanao, Y. Yamamoto, T. Arie, S. Akita and K. Takei, *ACS Nano*, 2014, **8**, 12851–12857.
- 87 A. Nag, S. Feng, S. C. Mukhopadhyay, J. Kosel and D. Inglis, *Sens Actuators A Phys*, 2018, **280**, 525–534.
